# Supplementary material for: In situ formation of MnO@N-doped carbon for asymmetric supercapacitor with enhanced cycling performance
Source: Royal Society of Chemistry journal article supplement (doi:10.1039/d1qm01404h), 2021-12-30
Supplement: d1qm01404h2.pdf [file d1qm01404h2.pdf]

## Electronic Supplementary Information

### In situ formation of MnO@N-doped carbon for asymmetric supercapacitor with enhanced cycling performance

Maiyong Zhu\*, Chengyu Tu, Xuan Li, Qiao Luo, Songjun Li

Research School of Polymeric Materials, School of Materials Science & Engineering,

Jiangsu University, Zhenjiang, 212013, P. R. China

Corresponding author: maiyongzhu@ujs.edu.cn

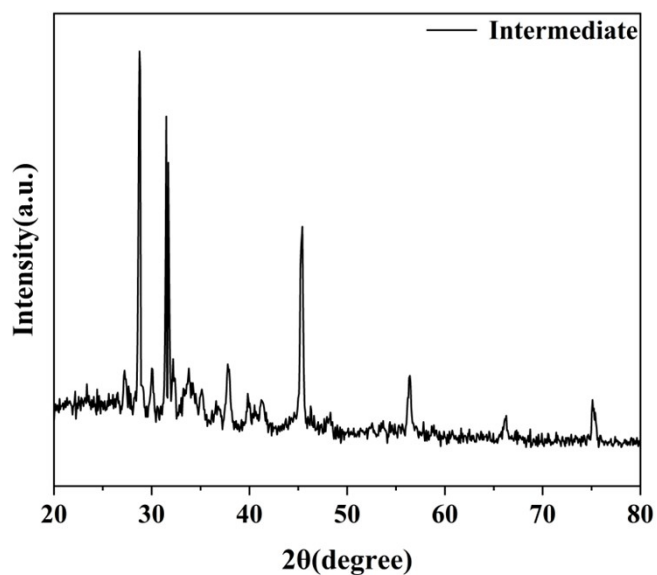

Figure S1. XRD pattern of intermediate.

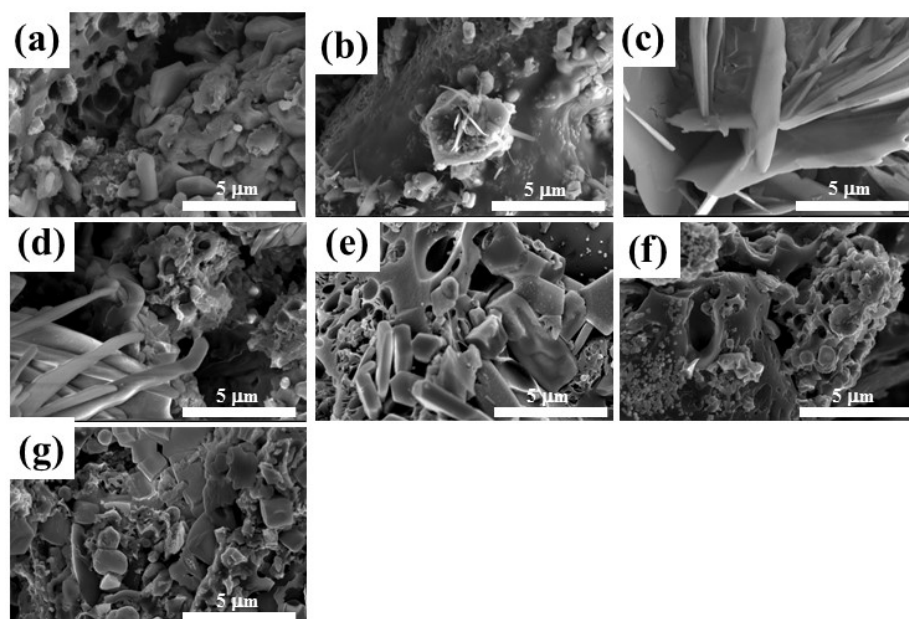

**Figure S2.** SEM image of (a) MnO-NC-0, (b) MnO-NC-0.05, (c) MnO-NC-0.1, (d) MnO-NC-0.25, (e) MnO-NC-0.5, (f) MnO-NC-0.75 and (g) MnO-NC-1.

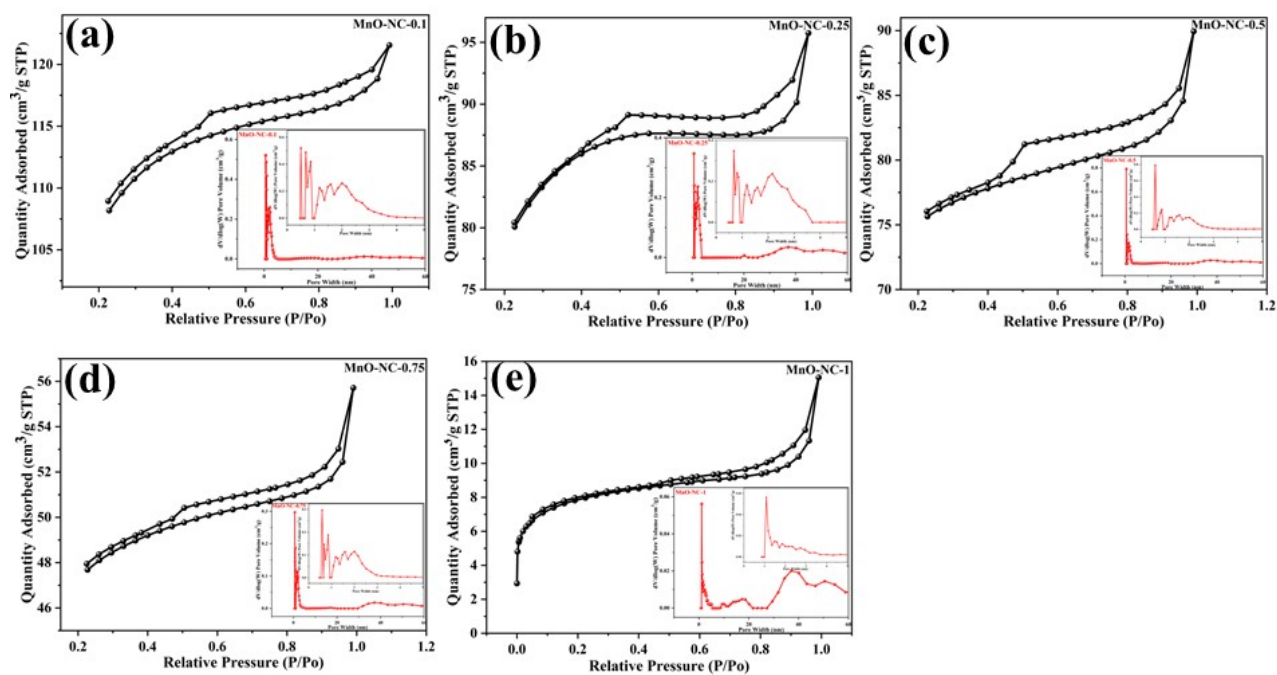

**Figure S3.** The nitrogen adsorption-desorption isotherms and the corresponding pore size distribution(inset) of (a) MnO-NC-0.1, (b) MnO-NC-0.25, (c) MnO-NC-0.5, (d) MnO-NC-0.75 and (e) MnO-NC-1.

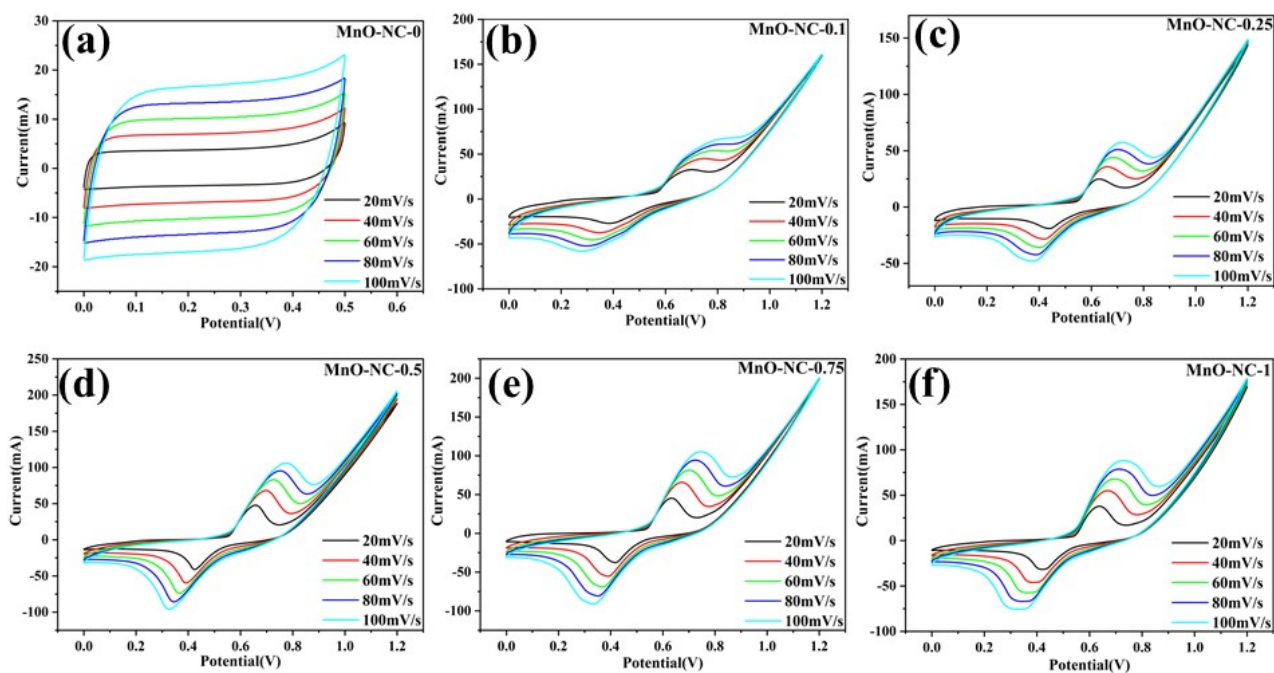

**Figure S4.** CV curves of (a) MnO-NC-0, (b) MnO-NC-0.1, (c) MnO-NC-0.25, (d) MnO-NC-0.5, (e) MnO-NC-0.75 and (f) MnO-NC-1.

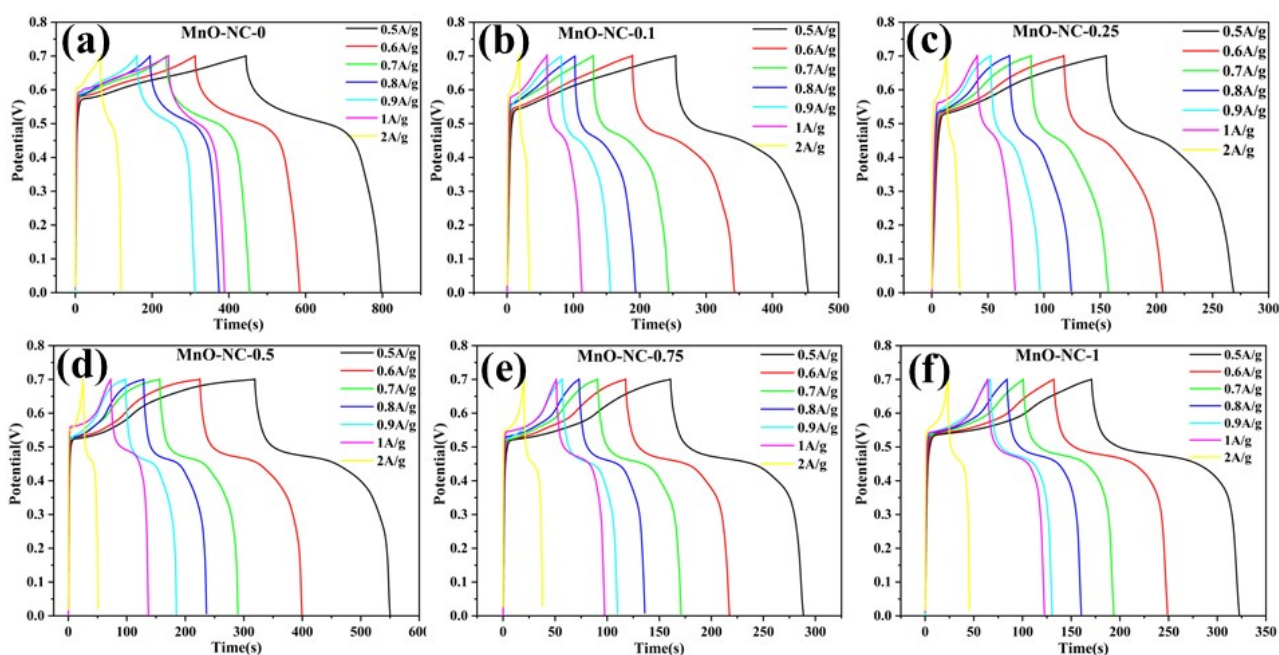

**Figure S5.** GCD curves of (a) MnO-NC-0, (b) MnO-NC-0.1, (c) MnO-NC-0.25, (d) MnO-NC-0.5, (e) MnO-NC-0.75 and (f) MnO-NC-1.

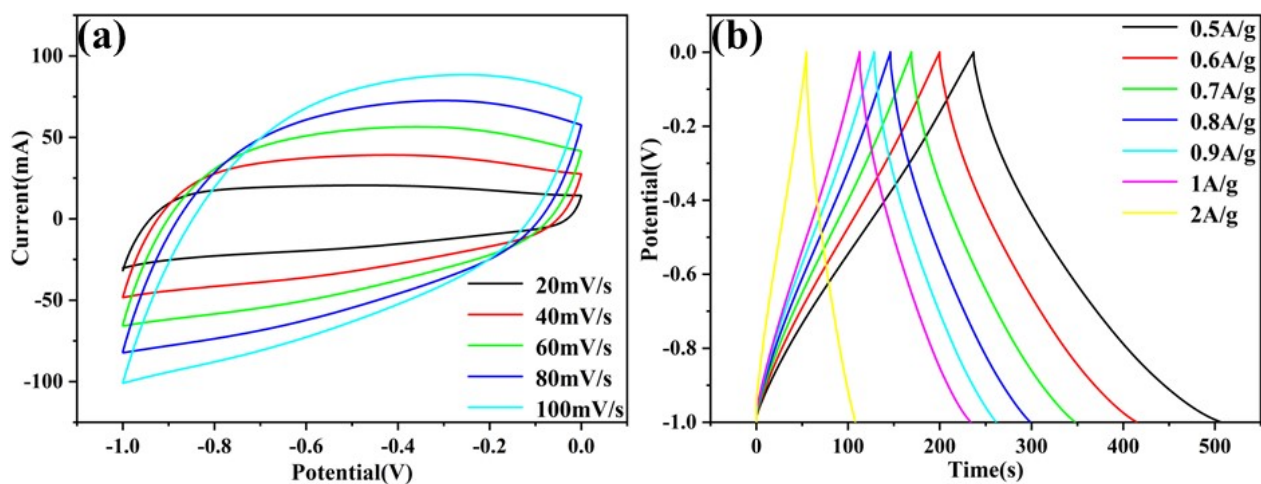

**Figure S6.** CV and GCD curves of AC.

**Table S1.** Relative atomic contents of nitrogen element in MnO-NC-0 and MnO-NC-0.05 based on XPS results.

| Sample             | Nitrogen species (at. %) |              |
|--------------------|--------------------------|--------------|
|                    | Pyridine N               | Pyrrole N    |
| <b>MnO-NC-0</b>    | 6.10(51.59%)*            | 4.33(48.41%) |
| <b>MnO-NC-0.05</b> | 5.12(51.18%)             | 4.49(48.82%) |

\* The value in bracket represents the relative atomic contents of nitrogen species obtained by fitting N 1s XPS spectra.
